# Supplementary material for: Menopausal hormone therapy and risk of ovarian cancer: systematic review and meta-analysis
Source: Oxford University Press journal article supplement (doi:10.1093/humupd/dmm012), 2007-06-15
Supplement: dmm012_Supplementary_Data.zip [file dmm012_Supplementary_Data.zip]

## **SUPPLEMENTARY DATA FOR A WEB APPENDIX**

### **Supplementary data I**

#### **Explanation of $I^2$ , Use of fixed models**

#### **Supplementary Table I.** Excluded studies

Supplementary Table II . Summary estimates of risks in 3 hormone therapy groups (ever use), stratified for histological subtypes

Supplementary Table III Summary estimates of risk increases per year in 3 hormone therapy groups (ever use), stratified by histological subtypes

Supplementary data 2 **References** of excluded studies,

#### **Supplementary Figure 1**

#### **Supplementary Figure 2**

## Supplementary Data 1

### Explanation of $I^2$

$I^2$  is derived from Cochran's Q with this formula (k=number of studies included into meta-analysis):

$$I^2 = \frac{\left( \frac{Q}{(k-1)} \right) - 1}{\frac{Q}{(k-1)}}$$

Several methods were proposed (Higgins *et al.*, 2002) to calculate the 95% uncertainty interval, a parameter comparable to confidence intervals of epidemiological risk parameters. We applied method III proposed (Higgins *et al.*, 2002), based on the statistical significance of Q and using formula 26.4.36 (Abramowitz and Stegun, 1965) to calculate the variance of the uncertainty interval  $I^2$ . There are two different formulas to derive at the standard error (SE) of  $Q/(k-1)$ , dependent on the magnitude of Q. If  $Q > k$  then

$$\ln(SE) = 0.5 \frac{\ln(Q) - \ln(k-1)}{\sqrt{2Q} - \sqrt{2k-3}}$$

whereas if  $Q \leq k$ , then

$$\ln(SE) = \sqrt{\left( \frac{1}{2(k-2)} * \left( 1 - \frac{1}{3(k-2)^2} \right) \right)}$$

The latter formula obviously does not allow the estimation of the standard error, if there are two studies only. There is still no generally accepted cut point for  $I^2$ , above which heterogeneity should be assumed. Higgins and co-authors (2003) discussed tentative values of 25%, 50% and 75% for low, moderate and high amount of heterogeneity, respectively. An  $I^2$  value of 0 indicates lack of heterogeneity. In case heterogeneity is detected by a fixed-effects model, it is not recommended (Petitti, 2000) to control for heterogeneity by a random-effects model. Therefore we restricted our analyses to fixed-effects models.

### Use of fixed models [general variance-based method (Petitti, 2000)].

This method uses published confidence intervals to calculate the variance for each risk parameter. To derive variances and study weights from published confidence intervals we applied the following formula: Variance =  $((\log(RR/CIL)/1.96))^2$ , where RR = risk parameter (relative risk or odds ratio), CIL = lower bound of confidence interval of risk parameter, and Weight = 1/variance

Higgins JPT and Thompson SG (2002) Quantifying heterogeneity in a meta-analysis. *Statist Med* 21,1539-1558.

Abramowitz M and Stegun IA (1965) Handbook of mathematical functions with formulas, graphs, and mathematical tables. Dover Publications, New York.

Higgins JPT, Thompson SG, Deeks JJ and Altman DG (2003) Measuring inconsistency in meta-analyses. *BMJ* 327,557-560.

Pettiti DB (2000) Statistical methods in meta-analysis. In Pettiti DB, (ed). *Meta-Analysis, Decision Analysis, and Cost-Effectiveness Analysis*, 2nd edn. Oxford University Press, New York, pp. 63-67, 111-113.

**Supplementary Table I.** Excluded studies

| Author (s)          | Year of publication | Type of Study   | Reasons for exclusion                                                   |
|---------------------|---------------------|-----------------|-------------------------------------------------------------------------|
| Adami et al.        | 1989                | Cohort          | Same cohort as study by Persson <i>et al.</i> , 1996; shorter follow-up |
| Annegers et al.     | 1977                | CC              | More recent study (Annegers <i>et al.</i> , 1979) included              |
| Arslan et al.       | 2003                | CC              | No analysis of MHT (confounder variable)                                |
| Bertone et al       | 2001                | Cohort          | No analysis of MHT (confounder variable)                                |
| Bibbo et al.        | 1978                | Cohort          | Use of DES only                                                         |
| Biesma et al.       | 2006                | Cohort          | No analysis of MHT (confounder variable)                                |
| Braaten et al.      | 2005                | Cohort          | No analysis of MHT for ovarian cancer                                   |
| Cunat et al.        | 2004                | Experimental    | No suitable study type                                                  |
| Dinger et al.       | 2006                | Cohort          | No incident cancer data                                                 |
| Eltabbakh et al.    | 1999                | Case study      | No suitable study type, comparison of two groups                        |
| Eltabbakh et al.    | 1998                | Case study      | Same reason as above                                                    |
| Fairfield et al.    | 2002                | Cohort          | No analysis of MHT (confounder variable)                                |
| Fairfield et al.    | 2004                | Cohort          | No analysis of MHT (confounder variable)                                |
| Franceschi et al.   | 1982                | CC              | No risk estimate provided                                               |
| Gnagy et al.        | 2000                | Ecologic study  | Statistics provided unsuitable for pooling                              |
| Goodman et al.      | 2003                | Cancer registry | Descriptive data only                                                   |
| Goodman et al.      | 2001                | CC              | Analysis of genetic polymorphisms                                       |
| Grodstein et al.    | 1997                | Cohort          | RR without confidence interval provided                                 |
| Hadjimichael et al. | 1984                | Cohort          | Results refer to DES                                                    |

|                   |      |           |                                                                                                                                                          |
|-------------------|------|-----------|----------------------------------------------------------------------------------------------------------------------------------------------------------|
| Hannan et al.     | 2004 | Cohort    | No analysis of MHT (confounder variable)                                                                                                                 |
| Harlow et al.     | 1988 | CC        | OR without CI                                                                                                                                            |
| Herrinton et al.  | 2001 | CC        | Same study as Lee <i>et al.</i> , 1986                                                                                                                   |
| Hoover et al.     | 1977 | Cohort    | Use of DES only                                                                                                                                          |
| Hunt et al.       | 1990 | Cohort    | Analysis for ovarian and tuboovarian carcinomas combined                                                                                                 |
| Kelemen et al.    | 2004 | Cohort    | No analysis of MHT (confounder variable)                                                                                                                 |
| Komulainen et al. | 1999 | RCT       | No RR for MHT provided                                                                                                                                   |
| Larsson et al.    | 2004 | Cohort    | No analysis of MHT (confounder variable)                                                                                                                 |
| McGowan et al.    | 1988 | CC        | Identical study (Hartge <i>et al.</i> , 1988) included providing more detailed analyses                                                                  |
| Mink et al.       | 1996 | Cohort    | Same cohort as Folsom <i>et al.</i> , 2004; shorter follow-up                                                                                            |
| Moorhead et al.   | 1997 | Nested CC | Time sequence of HT and incident disease undetermined                                                                                                    |
| Mosekilde et al.  | 2000 | RCT       | Allocation of ovarian cancer cases impossible as assignment of cancer cases to exact treatment groups in randomized and non-randomized substrata unclear |
| Ness et al.       | 2000 | CC        | No analysis of MHT (confounder variable)                                                                                                                 |
| Niwa et al.       | 2005 | Cohort    | No ovarian cancer case in MHT group                                                                                                                      |
| Purdie et al.     | 1995 | CC        | Later publication included (Purdie <i>et al.</i> , 1999) with more detailed analyses                                                                     |
| Purdie et al.     | 1996 | CC        | Same reason as above                                                                                                                                     |
| Riman             | 2003 | CC        | Full publications of the same study (Riman <i>et al.</i> , 2002a; Riman <i>et al.</i> , 2002b) included                                                  |
| Rodriguez         | 1995 | Cohort    | Same cohort as Rodriguez <i>et al.</i> , 2001; shorter follow-up                                                                                         |
| Rodriguez         | 2002 | Cohort    | Impact of ET on OvC risk analyses dependent on BMI and body height                                                                                       |
| Rossing et al.    | 1994 | Cohort    | only use of fertility drugs reported                                                                                                                     |
| Schairer et al.   | 1997 | Cohort    | Same cohort as Persson <i>et al.</i> , 1996; shorter follow-up                                                                                           |
| Schouten et al.   | 2003 | Cohort    | No analysis of MHT (confounder variable)                                                                                                                 |
| Schouten et al.   | 2004 | Cohort    | No analysis of MHT (confounder variable)                                                                                                                 |
| Tavani et al.     | 2000 | CC        | Overlap with included study (Parazzini <i>et al.</i> , 1994)                                                                                             |
| Tung et al.       | 2005 | CC        | Included study (Tung <i>et al.</i> , 2003) provided more extractable details of same study population                                                    |

|               |      |     |                                                                                                                                                               |
|---------------|------|-----|---------------------------------------------------------------------------------------------------------------------------------------------------------------|
| Tzonou et al. | 1984 | CC  | RR provided, but no CI, study as published excluded; data set published later in a re-analysis included, see Table 1 (footnote to Negri <i>et al.</i> , 1999) |
| Vessey et al. | 1983 | RCT | Use of DES only                                                                                                                                               |
| West          | 1966 | CC  | no analysis of MHT                                                                                                                                            |
| Wynder et al. | 1969 | CC  | Unspecified female hormone therapy reported                                                                                                                   |
| Zhang et al.  | 2005 | CC  | No analysis of MHT (confounder variable)                                                                                                                      |

Abbreviations: CC= case-control study; MHT= menopausal hormone therapy; DES=diethylstilbestrol; RR= relative risk; OR = odds ration; CI = confidence interval; RCT = randomized controlled trial; OvC = ovarian cancer; BMI = body mass index.

\*Narrative reviews primarily excluded

**Supplementary Table II.** Summary estimates of risks in 3 hormone therapy groups (ever-use), stratified for histological subtypes

| Hormone therapy | Histology | Data sets (no.) | OR / RR (95% CI)        | Cochrane Q value | p     | I <sup>2</sup> (95% uncertainty interval) |
|-----------------|-----------|-----------------|-------------------------|------------------|-------|-------------------------------------------|
| EPT             | ALL       | 3               | 1.119 (0.962 to 1.301 ) | 1.5              | 0.465 | 0.0 (0.0 to 78.0 )                        |
| EPT             | END       | 2               | 1.332 (0.911 to 1.948 ) | 0.2              | 0.627 | 0.0 ( - )                                 |
| EPT             | EPI       | 14              | 1.107 (0.975 to 1.256 ) | 12.9             | 0.454 | 0.0 (0.0 to 49.0 )                        |
| EPT             | MUC       | 5               | 0.834 (0.530 to 1.315 ) | 2.2              | 0.705 | 0.0 (0.0 to 68.6 )                        |
| EPT             | OTH       | 2               | 0.558 (0.321 to 0.970 ) | 2.4              | 0.118 | 59.1 (0.0 to 80.9 )                       |
| EPT             | SER       | 5               | 1.231 (0.988 to 1.535 ) | 6.9              | 0.139 | 42.4 (0.0 to 69.7 )                       |
| ET              | ALL       | 3               | 1.194 (0.780 to 1.829 ) | 0.5              | 0.776 | 0.0 (0.0 to 78.0 )                        |
| ET              | END       | 2               | 1.808 (1.080 to 3.027 ) | 1.1              | 0.294 | 9.2 ( - )                                 |
| ET              | EPI       | 18              | 1.163 (1.034 to 1.307 ) | 45.3             | 0.000 | 62.5 (47.3 to 71.9 )                      |
| ET              | MUC       | 6               | 1.203 (0.810 to 1.785 ) | 6.0              | 0.303 | 17.2 (0.0 to 54.8 )                       |
| ET              | OTH       | 13              | 1.440 (1.164 to 1.781 ) | 24.3             | 0.019 | 50.6 (18.0 to 67.0 )                      |
| ET              | SER       | 6               | 1.525 (1.245 to 1.868 ) | 4.5              | 0.481 | 0.0 (0.0 to 64.8 )                        |
| MHT             | ALL       | 11              | 0.964 (0.899 to 1.034 ) | 40.8             | 0.000 | 75.5 (66.4 to 81.3 )                      |
| MHT             | CLE       | 5               | 1.290 (0.834 to 1.994 ) | 3.4              | 0.490 | 0.0 (0.0 to 68.6 )                        |
| MHT             | END       | 7               | 0.982 (0.799 to 1.208 ) | 25.5             | 0.000 | 76.5 (65.0 to 83.1 )                      |
| MHT             | EPI       | 28              | 1.089 (1.008 to 1.175 ) | 72.3             | 0.000 | 62.7 (51.3 to 70.5 )                      |
| MHT             | MUC       | 7               | 0.816 (0.608 to 1.096 ) | 7.0              | 0.319 | 14.6 (0.0 to 51.7 )                       |
| MHT             | OTH       | 6               | 0.943 (0.792 to 1.123 ) | 6.0              | 0.306 | 16.6 (0.0 to 68.5 )                       |
| MHT             | SER       | 8               | 1.181 (1.017 to 1.371 ) | 21.1             | 0.004 | 66.8 (46.1 to 77.5 )                      |
| PRO             | EPI       | 5               | 1.341 (0.842 to 2.136 ) | 6.3              | 0.175 | 36.9 (0.0 to 67.4 )                       |

Abbreviations: EPT = Estrogen progestin therapy; ET = unopposed estrogen therapy; MHT = combination of all regimens of menopausal hormone therapy, including unspecified / unknown preparations; PRO = progestin therapy;

OR = odds ratio; CI = confidence interval; ALL = all histological classifications combined or histology not specified; CLE = clear cell carcinoma

END = endometrioid carcinoma; EPI = epithelial carcinoma; MUC = mucinous carcinoma; OTH = other malignancies or unspecified other malignancies; SER = serous carcinoma;.

**Supplementary Table III.** Summary estimates of risk increases per year in 3 hormone therapy groups, stratified by histological subtypes

| Hormone therapy | Histology | Data sets (no.) | OR / RR (95% CI)       | Cochrane Q value | p     | I <sup>2</sup> (95% uncertainty interval) |
|-----------------|-----------|-----------------|------------------------|------------------|-------|-------------------------------------------|
| EPT             | ALL       | 2               | 0.965 (0.891 to 1.045) | 0.73             | 0.393 | 0.0 ( - )                                 |
| EPT             | END       | 3               | 1.079 (1.004 to 1.160) | 1.12             | 0.572 | 0.0 (0.0 to 78.0)                         |
| EPT             | EPI       | 7               | 1.032 (1.001 to 1.065) | 5.05             | 0.538 | 0.0 (0.0 to 61.7)                         |
| EPT             | MUC       | 4               | 1.027 (0.894 to 1.180) | 3.19             | 0.363 | 5.9 (0.0 to 74.2)                         |
| EPT             | OTH       | 1               | 1.020 (0.910 to 1.143) | -                | -     | -                                         |
| EPT             | SER       | 5               | 1.074 (1.023 to 1.127) | 2.73             | 0.604 | 0.0 (0.0 to 68.6)                         |
| ET              | ALL       | 3               | 1.064 (0.994 to 1.138) | 0.47             | 0.791 | 0.0 (0.0 to 78.0)                         |
| ET              | END       | 2               | 1.096 (1.073 to 1.119) | 0.01             | 0.906 | 0.0 ( - ).                                |
| ET              | EPI       | 6               | 1.052 (1.035 to 1.069) | 4.58             | 0.470 | 0.0 (0.0 to 64.8)                         |
| ET              | MUC       | 3               | 1.112 (0.943 to 1.312) | 4.24             | 0.120 | 52.8 (0.0 to 76.9)                        |
| ET              | OTH       | 1               | 1.060 (1.010 to 1.112) | -                | -     | -                                         |
| ET              | SER       | 3               | 1.065 (1.024 to 1.108) | 2.81             | 0.246 | 28.7 (0.0 to 81.4)                        |
| HT              | ALL       | 2               | 1.071 (1.039 to 1.103) | 5.02             | 0.025 | 80.1 (56.2 to 88.7)                       |
| HT              | CLE       | 1               | 1.005 (0.683 to 1.478) | -                | -     | -                                         |
| MHT             | END       | 8               | 1.053 (1.028 to 1.078) | 15.76            | 0.027 | 55.6 (18.0 to 72.2)                       |
| MHT             | EPI       | 16              | 1.025 (1.013 to 1.037) | 40.37            | 0.000 | 62.8 (46.8 to 72.6)                       |
| MHT             | MUC       | 13              | 0.987 (0.948 to 1.027) | 9.09             | 0.695 | 0.0 (0.0 to 50.2)                         |
| MHT             | OTH       | 8               | 1.043 (1.021 to 1.065) | 5.33             | 0.620 | 0.0 (0.0 to 59.1)                         |
| MHT             | SER       | 12              | 1.040 (1.025 to 1.056) | 12.27            | 0.344 | 10.3 (0.0 to 44.7)                        |

Abbreviations: EPT = Estrogen progestin therapy; ET = unopposed estrogen therapy; MHT = combination of all regimens of menopausal hormone therapy, including unspecified / unknown preparations; OR = odds ratio; CI = confidence interval; ALL = all histological classifications combined or histology not specified; CLE = clear cell carcinoma; END = endometrioid carcinoma; EPI = epithelial carcinoma; MUC = mucinous carcinoma; OTH = other malignancies or unspecified other malignancies; SER = serous carcinoma.

## Supplementary data 2

### References of excluded studies

Adami H-O, Persson I, Hoover R, Schairer C and Bergkvist L (1989) Risk of cancer in women receiving hormone replacement therapy. *Int J Cancer* 44,833-839.

Annegers JF, O'Fallon W and Kurland LT (1977) Exogenous oestrogens and ovarian cancer. *Lancet* 310,869-780.

Arslan AA, Zeleniuch-Jacquotte A, Lundin E, Micheli A, Lukanova A, Afanasyeva Y, Lenner P, Krogh V, Muti P, Rinaldi S et al. (2003) Serum follicle-stimulating hormone and risk of epithelial ovarian cancer in postmenopausal women. *Cancer Epidemiol Biomarkers Prev* 12,1331-1335.

Bertone ER, Willett WC, Rosner BA, Hunter DJ, Fuchs CS, Speizer FE, Colditz GA and Hankinson SE (2001) Prospective study of recreational physical activity and ovarian cancer. *J Natl Cancer Inst* 93,942-948.

Bibbo M, Haenszel WM, Wied GL, Hubby M and Herbst AL (1978) A twenty-five-year follow-up study of women exposed to diethylstilbestrol during pregnancy. *N Engl J Med* 298, 763-767.

Biesma RG, Schouten LJ, Dirx MJM, Goldbohm RA and van den Brandt PA (2006) Physical and risk of ovarian cancer: results from the Netherlands Cohort Study (The Netherlands). *Cancer Causes Control* 17,109-115.

Braaten T, Weiderpass E, Kumle M and Lund E (2005) Explaining the socioeconomic variation in cancer risk in the Norwegian women and cancer study. *Cancer Epidemiol Biomarkers Prev* 14,2591-2597.

Cunat S, Hoffmann P and Pujol P (2004) Estrogens and epithelial ovarian cancer. *Gynecol Oncol* 94,25-32.

Dinger JC, Heinemann LAJ, Thai DM, Möhner S, Assmann A and Thiel C (2006) The risk of gynecological cancers associated with different HRT formulations. A nested case-control study in the German Cohort Study on Womens' health. *Geburtsh Frauenheilk* 66,145-155.

Eltabbakh GH, Natarajan N, Piver St and Mettlin C (1999) Epidemiologic differences between women with borderline ovarian tumors and women with epithelial cancer. *Gynecol Oncol* 74,103-107.

Eltabbakh GH, Piver St, Natarajan N and Mettlin C (1998) Epidemiologic differences between women with extraovarian primary peritoneal carcinoma and women with epithelial ovarian cancer. *Obstet Gynecol* 91,254-259.

Fairfield KM, Hunter DJ, Colditz GA, Fuchs CS, Cramer DW, Speizer FE, Willett WC and Hankinson SE (2004) A prospective study of dietary lactose and ovarian cancer. *Int J Cancer* 110,271-277.

Fairfield KM, Willett WC, Rosner BA, Manson JE, Speizer FE and Hankinson SE (2002) Obesity, weight gain, and ovarian cancer. *Obstet Gynecol* 100, 288-296.

Franceschi S, La Vecchia C, Helmrich SP, Mangioni C and Tognoni G (1982) Risk factors for epithelial ovarian cancer in Italy. *Am J Epidemiol* 115,714-719.



- Gnagy S, Mink EE, Devesa SS, Hartge P and Whittemore AS (2000) Declining ovarian cancer rates in US women: results to parity and oral contraceptive use. *Epidemiology* 1,102-105.
- Goodman MT and Howe HL (2003) Descriptive epidemiology of ovarian cancer in the United States, 1992-1997. *Cancer* 297 (Suppl.),2615-2630.
- Goodman MT, McDuffie K, Kolonel LN, Terada K, Donlon TA, Wilkens LR, Guo C and Le Marchand L (2001) Case-control study of ovarian cancer and polymorphisms in genes involved in catecholestrogen formation and metabolism. *Cancer Epidemiol Biomarkers Prev* 10,209-216.
- Grodstein F, Stampfer MJ, Colditz GA, Willett WC, Manson JE, Joffe M, Rosner B, Fuchs C, Hankinson SE, Hunter DJ et al. (1997) Postmenopausal hormone therapy and mortality. *N Engl J Med* 336,1769-1775.
- Hadjimichael OC, Meigs JW, Falcier FW, Thompson WD and Flannery JT (1984) Cancer risk among women exposed to exogenous estrogens during pregnancy. *J Natl Cancer Inst* 73,831-834.
- Hannan LM, Leitzmann MF, Lacey JV, Colbert LH, Albanes D, Schatzkin A and Schairer C (2004) Physical activity and risk of ovarian cancer: a prospective cohort study in the United States. *Cancer Epidemiol Biomarkers Prev* 13,765-770.
- Harlow BL, Weiss NS, Roth GJ, Chu J and Daling JR (1988) Case-control study of borderline ovarian tumors: reproductive history and exposure to exogenous female hormones. *Cancer Res* 48,5849-5852.
- Herrinton LJ, Voigt LF, Weiss NS, Beresford SAA and Wingo PA (2001) Risk factors for synchronous primary endometrial and ovarian cancers. *Ann Epidemiol* 11,529-533.
- Hoover R, Gray LA Sr, and Fraumeni JF Jr (1977) Stilbestrol (diethylstilbestrol) and the risk of ovarian cancer. *Lancet* 310,533-534.
- Hunt K, Vessey M and McPherson K (1990) Mortality in a cohort of long-term users of hormone replacement therapy: an updated analysis. *Br J Obstet Gynecol* 97,1080-1086.
- Keleman LE, Sellers TA, Vierkant RA, Harnack L and Cerhan JR (2004) Association of folate and alcohol with risk of ovarian cancer in a prospective study of postmenopausal women. *Cancer Causes Control* 15,1085-1093.
- Komulainen M, Kröger H, Tuppurainen MT, Heikkinen A-M, Alhava E, Honkanen R, Jurvelin J and Saarikoski S (1999) Prevention of femoral and lumbar bone loss with hormone replacement therapy and vitamin D<sup>3</sup> in early postmenopausal women: a population-based 5-year randomized trial. *J Clin Endocrinol Metab.* 84,546-552.
- Larsson SC, Giovannucci E and Wolk A (2004) Dietary folate intake and incidence of ovarian cancer: the Swedish Mammography Cohort. *J Natl Cancer Inst* 96,396-402.
- McGowan L, Norris HJ, Hartge P, Hoover R and Leshner L (1988) Risk factors in ovarian cancer. *Eur J Gynaecol Oncol* 9,195-199.
- Mink PJ, Folsom AR, Sellers TA and Kushi L (1996) Physical activity, waist-to-hip ratio, and other risk factors for ovarian cancer: a follow-up study of older women. *Epidemiology* 7, 38-45.
- Moorhead T, Hannaford P and Warskyj M (1997) Prevalence and characteristics associated with use of hormone replacement therapy in Britain. *Br J Obstet Gynaecol* 104,290-297

- Mosekilde L, Beck-Nielsen H, Sørensen OH, Nielsen SP, Charles P, Vestergaard P, Hermann AP, Gram J, Hansen TB, Abrahamsen B et al. (2000) Hormonal replacement therapy reduces forearm fracture incidence in recent postmenopausal women – results from the Danish Osteoporosis Prevention Study. *Maturitas* 36,181-193.
- Ness RB, Grisso JA, Klapper J, Schlesselman JJ, Silberzweig S, Vergona R, Morgan M, Wheeler JE and the SHARE Study Group (2000) Risk of ovarian cancer in relation to estrogen and progestin dose and use characteristics of oral contraceptives. *Am J Epidemiol* 152,233-241.
- Niwa Y, Wakai K, Suzuki S, Tamakoshi K, Lin Y, Yatsuya H, Kondo T, Nishio K, Yamamoto A, Tokudome S et al. (2005) Cigarette smoking and the risk of ovarian cancer in the Japanese population: findings from the Japanese Collaborate Cohort Study. *J Obstet Gynaecol Res* 31,144-1451.
- Purdie D, Green A, Bain C, Siskind V, Ward B, Hacker N and Quinn M (1996) Estrogen replacement and risk of epithelial cancer. *Am J Epidemiol* 143(Suppl.), 43, Abstract no. 169
- Purdie D, Green A, Bain C, Siskind V, Ward B, Hacker N, Quinn M, Wright G, Russell P, Susil B for the Survey of Women's Health Study Group (1995) Reproductive and other factors and risk of epithelial ovarian cancer: an Australian case-control study. *Int J Cancer* 62, 678-684
- Riman T (2003) Ovarian and colon cancer: relation to HRT. *Maturitas* 44(Suppl.),2125. Abstract
- Rodriguez C, Calle EE, Coates RJ, Miracle-McMahill HL, Thun MJ and Heath CW (1995) Estrogen replacement therapy and fatal ovarian cancer. *Am J Epidemiol* 141,828-835.
- Rodriguez C, Calle EE, Fakhrabadi-Shokoohi D, Jacobs EJ and Thun MJ (2002) Body mass index, height, and the risk of ovarian cancer mortality in a prospective cohort of postmenopausal women. *Cancer Epidemiol Biomarkers Prev* 11,822-828.
- Rossing MA, Daling JR, Weiss NS, Moore DE and Self SG (1994) Ovarian tumors in a cohort of infertile women. *N Engl J Med* 331,771-776.
- Schairer C, Adami H-O, Hoover R and Persson I (1997) Cause-specific mortality in women receiving hormone replacement therapy. *Epidemiology* 8,59-65.
- Schouten LJ, Goldbohm A and van den Brandt PA (2003) Height, weight change, and ovarian cancer risk in the Netherlands cohort study on diet and cancer. *Am J Epidemiol* 157, 424-433.
- Schouten LJ, Zeegers MPA, Goldbohm RA and van den Brandt PA (2004) Alcohol and ovarian cancer risk: results from the Netherlands Cohort Study. *Cancer Causes Control* 15, 201-209.
- Tavani A, Ricci E, La Vecchia C, Surace M, Benzi G, Parazzini F and Franceschi S (2000) Influence of menstrual and reproductive factors on ovarian cancer risk in women with and without family history of breast or ovarian cancer. *Int J Epidemiol* 29,799-802.
- Tung K-H, Wilkens LR, Wu AH, McDuffie K, Nomura AMY, Kolonel LN, Terada K and Goodman MT (2005) Effect of anovulation factors on pre- and postmenopausal ovarian cancer risk: revisiting the incessant ovulation hypothesis. *Am J Epidemiol* 161,321-329.
- Tzonou A, Day NE, Trichopoulos D, Walker A, Saliarakis M, Papapostolou M and Polychronopoulou A (1984) The epidemiology of ovarian cancer in Greece: a case-control study. *Eur J Cancer Clin Oncol* 20, 1045-1052.

Vessey MP, Fairweather DVI, Norman-Smith B and Buckley J (1983) A randomised double-blind controlled trial of the value of stilboestrol therapy in pregnancy: long-term follow-up of mothers and their offspring. *Br J Obstet Gynaecol* 90,1007-1017.

West RO (1966) Epidemiologic study of malignancies of the ovaries. *Cancer* 19,1001-1007.

Wynder EL, Dodo H and Barber HRK (1969) Epidemiology of cancer of the ovary. *Cancer* 23,352-370.

Zhang M, Xie X and Holman CD (2005) Body weight and body mass index and ovarian cancer risk: a case-control study in China. *Gynecol Oncol* 98,228-234.

Potentially relevant studies  
identified and screened for retrieval  
(n = 257, computerized and manually)

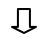

Studies retrieved  
for detailed evaluation (n = 91)

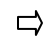

Studies excluded (n = 49)

Reasons:

HT confounder only (n = 14)

Overlap with included publication (n = 12)

Extraction of data not possible (n = 9)

Studies assessed ineligible sex hormone (DES; n = 4)

Further factors relevant for exclusion (n = 10)

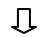

Studies finally included  
(n = 42)

**Supplementary Figure 1.** Process of identification of eligible studies for meta-analyses

1 / variance

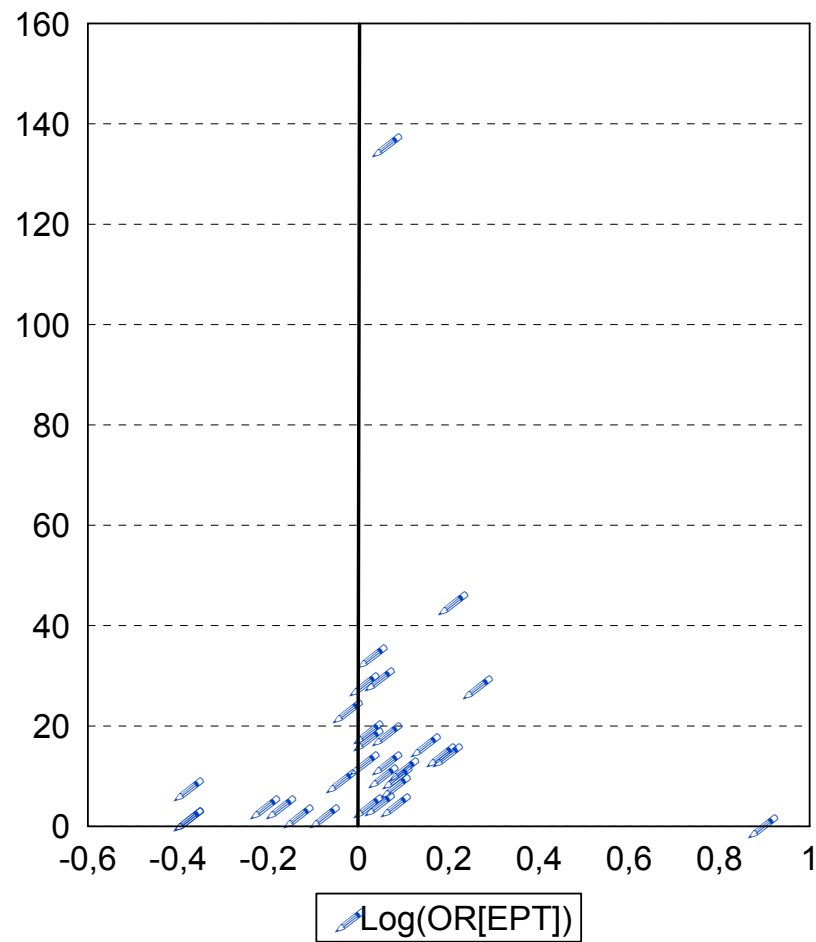

**Supplementary Figure 2.** Funnel plot: asymmetry of estrogen plus progestin therapy studies (EPT) reporting decreased and increased odds ratios (OR) for ovarian cancer risks
